# Supplementary material for: siRNA-Finder (si-Fi) Software for RNAi-Target Design and Off-Target Prediction
Source: Front Plant Sci. 2019 Aug 15;10:1023. doi: 10.3389/fpls.2019.01023 (PMC6704232; doi:10.3389/fpls.2019.01023)
Supplement: Supplementary Table S3 — Statistical summary of the Dunnet’s multiple comparison test of control (empty vector) vs. test constructs. VECT = empty vector control. [file Table_3.xlsx]

## Sheet: Sheet1
VECT.=Empty vector (negative) control
Number of families	1
Number of comparisons per family	20
Alpha	0.05
Dunnett's multiple comparisons test
Pairs	Mean Diff.	95.00% CI of diff.	Significant?	Summary	Adjusted P Value
VECT. vs. 0MY	1.228	0.5156 to 1.941	Yes	****	0.0001
VECT. vs. 1MY	1.237	0.1984 to 2.276	Yes	**	0.009
VECT. vs. 2MY	1.476	0.4368 to 2.514	Yes	***	0.0008
VECT. vs. 3MY	1.951	0.9118 to 2.989	Yes	****	0.0001
VECT. vs. 4MY	1.006	-0.03324 to 2.044	No	ns	0.0644
VECT. vs. 5MY	0.3886	-0.364 to 1.141	No	ns	0.7771
VECT. vs. 10MY	0.02632	-0.7263 to 0.7789	No	ns	0.9999
VECT. vs. 15MY	-0.1002	-1.071 to 0.871	No	ns	0.9996
VECT. vs. 20MY	0.2013	-0.7698 to 1.172	No	ns	0.9991
VECT. vs. 25MY	0.3741	-0.597 to 1.345	No	ns	0.9721
VECT. vs. 30MY	0.1684	-0.8027 to 1.14	No	ns	0.9993
VECT. vs. 35MY	0.2327	-0.7384 to 1.204	No	ns	0.9989
VECT. vs. 40MY	-0.1102	-1.081 to 0.861	No	ns	0.9996
VECT. vs. 45MY	-0.1116	-1.083 to 0.8595	No	ns	0.9996
VECT. vs. 50MY	0.2713	-0.6998 to 1.242	No	ns	0.9951
VECT. vs. 1-100W	0.5531	-0.364 to 1.47	No	ns	0.5762
VECT. vs. 101-200W	0.4731	-0.444 to 1.39	No	ns	0.7781
VECT. vs. 201-300W	0.6593	-0.2578 to 1.576	No	ns	0.333
VECT. vs. 301-400W	0.09413	-0.877 to 1.065	No	ns	0.9996
VECT. vs. 401-500W	1.511	0.5402 to 2.482	Yes	***	0.0002
Test details	Mean 1	Mean 2	Mean Diff.	SE of diff.	n1	n2	q	DF
VECT. vs. 0MY	-0.1344	-1.363	1.228	0.2408	45	15	5.101	203
VECT. vs. 1MY	-0.1344	-1.372	1.237	0.351	45	6	3.525	203
VECT. vs. 2MY	-0.1344	-1.61	1.476	0.351	45	6	4.204	203
VECT. vs. 3MY	-0.1344	-2.085	1.951	0.351	45	6	5.557	203
VECT. vs. 4MY	-0.1344	-1.14	1.006	0.351	45	6	2.865	203
VECT. vs. 5MY	-0.1344	-0.5231	0.3886	0.2543	45	13	1.528	203
VECT. vs. 10MY	-0.1344	-0.1608	0.02632	0.2543	45	13	0.1035	203
VECT. vs. 15MY	-0.1344	-0.03429	-0.1002	0.3281	45	7	0.3053	203
VECT. vs. 20MY	-0.1344	-0.3357	0.2013	0.3281	45	7	0.6134	203
VECT. vs. 25MY	-0.1344	-0.5086	0.3741	0.3281	45	7	1.14	203
VECT. vs. 30MY	-0.1344	-0.3029	0.1684	0.3281	45	7	0.5133	203
VECT. vs. 35MY	-0.1344	-0.3671	0.2327	0.3281	45	7	0.7092	203
VECT. vs. 40MY	-0.1344	-0.02429	-0.1102	0.3281	45	7	0.3357	203
VECT. vs. 45MY	-0.1344	-0.02286	-0.1116	0.3281	45	7	0.3401	203
VECT. vs. 50MY	-0.1344	-0.4057	0.2713	0.3281	45	7	0.8267	203
VECT. vs. 1-100W	-0.1344	-0.6875	0.5531	0.3099	45	8	1.785	203
VECT. vs. 101-200W	-0.1344	-0.6075	0.4731	0.3099	45	8	1.527	203
VECT. vs. 201-300W	-0.1344	-0.7938	0.6593	0.3099	45	8	2.128	203
VECT. vs. 301-400W	-0.1344	-0.2286	0.09413	0.3281	45	7	0.2869	203
VECT. vs. 401-500W	-0.1344	-1.646	1.511	0.3281	45	7	4.606	203
