# Supplementary material for: siRNA-Finder (si-Fi) Software for RNAi-Target Design and Off-Target Prediction
Source: Front Plant Sci. 2019 Aug 15;10:1023. doi: 10.3389/fpls.2019.01023 (PMC6704232; doi:10.3389/fpls.2019.01023)
Supplement: Supplementary Table S4 — Summary of all putative siRNAs with their predicted properties. The columns content is as follows:“siRNA_sequence” – sequence of the siRNA; “siRNA_name” – programm internal sequence identifier; “siRNA_position” – start position of the siRNA based on the trigger sequence ruler; “HS_mode_selected” – whether or not the siRNA meets the criteria of the HS-mode selection; “HE_mode_selected” - whether or not the siRNA meets the criteria of the HE-mode selection; “hit_name” – sequence identifier of the matched target; “mismatches” – number of mismatches to the target sequence; “is_off_target” – whether the match is to the main target or to a off-target based on the user selection; “accessibility_value” – target site local accessibility value; “target_site_accessibility_>0.1” – indicated whether or not the target site local accessibility is higher that the selected threshold (in this case 0.1); “reference_strand_pos” – start position of the siRNA target sequence based on the target sequence ruller; “end_stability_positive” – indicates whether or not the sequence meet the criteria for end-stability rules; “strand_selection_positive” – indicates whether or not the sequence meets the criteria for strand selection. [file Table_4.xlsx]

## Sheet: x
siRNA_sequence	siRNA_name	siRNA_position	HS_mode_selected	HE_mode_selected	hit_name	mismatches	is_off_target	accessibility_value	target_site_accessibility_>0.1	reference_strand_pos	strand	end_stability_positive	strand_selection_positive
CAGATGGCGCATTTTGTGTGG	siRNA1	1	TRUE	FALSE	mlo	0	FALSE	0.000891208	FALSE	0	+	FALSE	TRUE
AGATGGCGCATTTTGTGTGGA	siRNA2	2	FALSE	FALSE	mlo	0	FALSE	0.000832606	FALSE	1	+	FALSE	FALSE
GATGGCGCATTTTGTGTGGAC	siRNA3	3	FALSE	FALSE	mlo	0	FALSE	0.000784921	FALSE	2	+	FALSE	FALSE
ATGGCGCATTTTGTGTGGACA	siRNA4	4	FALSE	FALSE	mlo	0	FALSE	0.000265036	FALSE	3	+	FALSE	FALSE
TGGCGCATTTTGTGTGGACAG	siRNA5	5	FALSE	FALSE	mlo	0	FALSE	0.000365952	FALSE	4	+	FALSE	FALSE
GGCGCATTTTGTGTGGACAGT	siRNA6	6	TRUE	FALSE	mlo	0	FALSE	0.0184646	FALSE	5	+	TRUE	TRUE
GCGCATTTTGTGTGGACAGTG	siRNA7	7	TRUE	FALSE	mlo	0	FALSE	0.00507985	FALSE	6	+	TRUE	TRUE
CGCATTTTGTGTGGACAGTGG	siRNA8	8	TRUE	FALSE	mlo	0	FALSE	0.000185139	FALSE	7	+	TRUE	TRUE
GCATTTTGTGTGGACAGTGGC	siRNA9	9	TRUE	FALSE	mlo	0	FALSE	0.000178467	FALSE	8	+	TRUE	TRUE
CATTTTGTGTGGACAGTGGCC	siRNA10	10	FALSE	FALSE	mlo	0	FALSE	5.52576e-05	FALSE	9	+	FALSE	FALSE
ATTTTGTGTGGACAGTGGCCA	siRNA11	11	FALSE	FALSE	mlo	0	FALSE	8.53015e-05	FALSE	10	+	FALSE	FALSE
TTTTGTGTGGACAGTGGCCAC	siRNA12	12	FALSE	FALSE	mlo	0	FALSE	9.8247e-05	FALSE	11	+	FALSE	FALSE
TTTGTGTGGACAGTGGCCACG	siRNA13	13	FALSE	FALSE	mlo	0	FALSE	0.00012796	FALSE	12	+	FALSE	FALSE
TTGTGTGGACAGTGGCCACGC	siRNA14	14	FALSE	FALSE	mlo	0	FALSE	6.45745e-05	FALSE	13	+	FALSE	FALSE
TGTGTGGACAGTGGCCACGCC	siRNA15	15	FALSE	FALSE	mlo	0	FALSE	0.00105066	FALSE	14	+	FALSE	FALSE
GTGTGGACAGTGGCCACGCCC	siRNA16	16	FALSE	FALSE	mlo	0	FALSE	9.95883e-05	FALSE	15	+	FALSE	FALSE
TGTGGACAGTGGCCACGCCCG	siRNA17	17	FALSE	FALSE	mlo	0	FALSE	0.000108315	FALSE	16	+	FALSE	FALSE
GTGGACAGTGGCCACGCCCGG	siRNA18	18	FALSE	FALSE	mlo	0	FALSE	1.14165e-05	FALSE	17	+	FALSE	FALSE
TGGACAGTGGCCACGCCCGGC	siRNA19	19	FALSE	FALSE	mlo	0	FALSE	3.01357e-05	FALSE	18	+	FALSE	FALSE
GGACAGTGGCCACGCCCGGCT	siRNA20	20	TRUE	FALSE	mlo	0	FALSE	0.000108692	FALSE	19	+	TRUE	TRUE
GACAGTGGCCACGCCCGGCTT	siRNA21	21	FALSE	FALSE	mlo	0	FALSE	0.000106933	FALSE	20	+	FALSE	FALSE
ACAGTGGCCACGCCCGGCTTG	siRNA22	22	TRUE	FALSE	mlo	0	FALSE	0.000304301	FALSE	21	+	FALSE	FALSE
CAGTGGCCACGCCCGGCTTGA	siRNA23	23	TRUE	FALSE	mlo	0	FALSE	0.00122298	FALSE	22	+	TRUE	TRUE
AGTGGCCACGCCCGGCTTGAA	siRNA24	24	TRUE	FALSE	mlo	0	FALSE	0.00284186	FALSE	23	+	FALSE	TRUE
GTGGCCACGCCCGGCTTGAAG	siRNA25	25	TRUE	FALSE	mlo	0	FALSE	0.00151046	FALSE	24	+	TRUE	TRUE
TGGCCACGCCCGGCTTGAAGA	siRNA26	26	TRUE	FALSE	mlo	0	FALSE	0.011773	FALSE	25	+	TRUE	TRUE
GGCCACGCCCGGCTTGAAGAA	siRNA27	27	TRUE	FALSE	mlo	0	FALSE	0.0304487	FALSE	26	+	TRUE	TRUE
GCCACGCCCGGCTTGAAGAAA	siRNA28	28	TRUE	FALSE	mlo	0	FALSE	0.0372886	FALSE	27	+	TRUE	TRUE
CCACGCCCGGCTTGAAGAAAT	siRNA29	29	TRUE	FALSE	mlo	0	FALSE	0.0226886	FALSE	28	+	TRUE	TRUE
CACGCCCGGCTTGAAGAAATG	siRNA30	30	TRUE	FALSE	mlo	0	FALSE	0.0218912	FALSE	29	+	TRUE	TRUE
ACGCCCGGCTTGAAGAAATGC	siRNA31	31	TRUE	FALSE	mlo	0	FALSE	0.0027162	FALSE	30	+	TRUE	TRUE
CGCCCGGCTTGAAGAAATGCT	siRNA32	32	TRUE	FALSE	mlo	0	FALSE	0.00246445	FALSE	31	+	TRUE	TRUE
GCCCGGCTTGAAGAAATGCTA	siRNA33	33	TRUE	FALSE	mlo	0	FALSE	0.00330214	FALSE	32	+	TRUE	TRUE
CCCGGCTTGAAGAAATGCTAC	siRNA34	34	TRUE	FALSE	mlo	0	FALSE	0.00262696	FALSE	33	+	TRUE	TRUE
CCGGCTTGAAGAAATGCTACC	siRNA35	35	TRUE	FALSE	mlo	0	FALSE	0.0024908	FALSE	34	+	TRUE	TRUE
CGGCTTGAAGAAATGCTACCA	siRNA36	36	TRUE	FALSE	mlo	0	FALSE	0.00247759	FALSE	35	+	TRUE	TRUE
GGCTTGAAGAAATGCTACCAC	siRNA37	37	TRUE	FALSE	mlo	0	FALSE	0.0022472	FALSE	36	+	TRUE	TRUE
GCTTGAAGAAATGCTACCACA	siRNA38	38	TRUE	FALSE	mlo	0	FALSE	0.00247357	FALSE	37	+	FALSE	TRUE
CTTGAAGAAATGCTACCACAC	siRNA39	39	FALSE	FALSE	mlo	0	FALSE	0.880016	TRUE	38	+	FALSE	FALSE
TTGAAGAAATGCTACCACACG	siRNA40	40	FALSE	FALSE	mlo	0	FALSE	0.0021814	FALSE	39	+	FALSE	FALSE
TGAAGAAATGCTACCACACGC	siRNA41	41	FALSE	FALSE	mlo	0	FALSE	0.000717352	FALSE	40	+	FALSE	FALSE
GAAGAAATGCTACCACACGCA	siRNA42	42	FALSE	FALSE	mlo	0	FALSE	0.00468777	FALSE	41	+	FALSE	TRUE
AAGAAATGCTACCACACGCAG	siRNA43	43	FALSE	FALSE	mlo	0	FALSE	0.00973028	FALSE	42	+	FALSE	FALSE
AGAAATGCTACCACACGCAGA	siRNA44	44	TRUE	FALSE	mlo	0	FALSE	0.014584	FALSE	43	+	FALSE	FALSE
GAAATGCTACCACACGCAGAT	siRNA45	45	FALSE	FALSE	mlo	0	FALSE	0.0204578	FALSE	44	+	FALSE	FALSE
AAATGCTACCACACGCAGATC	siRNA46	46	FALSE	FALSE	mlo	0	FALSE	0.0257242	FALSE	45	+	FALSE	FALSE
AATGCTACCACACGCAGATCG	siRNA47	47	FALSE	FALSE	mlo	0	FALSE	0.025834	FALSE	46	+	FALSE	FALSE
ATGCTACCACACGCAGATCGG	siRNA48	48	FALSE	FALSE	mlo	0	FALSE	0.00142446	FALSE	47	+	FALSE	FALSE
TGCTACCACACGCAGATCGGG	siRNA49	49	TRUE	FALSE	mlo	0	FALSE	0.000585805	FALSE	48	+	FALSE	TRUE
GCTACCACACGCAGATCGGGC	siRNA50	50	FALSE	FALSE	mlo	0	FALSE	0.000319295	FALSE	49	+	FALSE	FALSE
CTACCACACGCAGATCGGGCT	siRNA51	51	FALSE	FALSE	mlo	0	FALSE	0.000281905	FALSE	50	+	FALSE	FALSE
TACCACACGCAGATCGGGCTG	siRNA52	52	FALSE	FALSE	mlo	0	FALSE	0.00034134	FALSE	51	+	FALSE	FALSE
ACCACACGCAGATCGGGCTGA	siRNA53	53	TRUE	FALSE	mlo	0	FALSE	0.00127607	FALSE	52	+	FALSE	TRUE
CCACACGCAGATCGGGCTGAG	siRNA54	54	TRUE	FALSE	mlo	0	FALSE	0.00204125	FALSE	53	+	FALSE	TRUE
CACACGCAGATCGGGCTGAGC	siRNA55	55	TRUE	FALSE	mlo	0	FALSE	0.0011619	FALSE	54	+	TRUE	TRUE
ACACGCAGATCGGGCTGAGCA	siRNA56	56	FALSE	FALSE	mlo	0	FALSE	0.000342518	FALSE	55	+	FALSE	FALSE
CACGCAGATCGGGCTGAGCAT	siRNA57	57	FALSE	FALSE	mlo	0	FALSE	0.00055744	FALSE	56	+	FALSE	FALSE
ACGCAGATCGGGCTGAGCATC	siRNA58	58	TRUE	FALSE	mlo	0	FALSE	0.00125058	FALSE	57	+	FALSE	FALSE
CGCAGATCGGGCTGAGCATCA	siRNA59	59	TRUE	FALSE	mlo	0	FALSE	0.00310766	FALSE	58	+	TRUE	TRUE
GCAGATCGGGCTGAGCATCAT	siRNA60	60	TRUE	FALSE	mlo	0	FALSE	0.0496982	FALSE	59	+	TRUE	TRUE
CAGATCGGGCTGAGCATCATG	siRNA61	61	TRUE	FALSE	mlo	0	FALSE	0.041449	FALSE	60	+	FALSE	TRUE
AGATCGGGCTGAGCATCATGA	siRNA62	62	TRUE	FALSE	mlo	0	FALSE	0.0617835	FALSE	61	+	FALSE	TRUE
GATCGGGCTGAGCATCATGAA	siRNA63	63	FALSE	FALSE	mlo	0	FALSE	0.0610983	FALSE	62	+	FALSE	TRUE
ATCGGGCTGAGCATCATGAAG	siRNA64	64	FALSE	FALSE	mlo	0	FALSE	0.0336882	FALSE	63	+	FALSE	FALSE
TCGGGCTGAGCATCATGAAGG	siRNA65	65	TRUE	FALSE	mlo	0	FALSE	0.0166239	FALSE	64	+	TRUE	TRUE
CGGGCTGAGCATCATGAAGGT	siRNA66	66	TRUE	FALSE	mlo	0	FALSE	0.010264	FALSE	65	+	TRUE	TRUE
GGGCTGAGCATCATGAAGGTG	siRNA67	67	TRUE	FALSE	mlo	0	FALSE	0.00167312	FALSE	66	+	TRUE	TRUE
GGCTGAGCATCATGAAGGTGG	siRNA68	68	TRUE	FALSE	mlo	0	FALSE	0.000583433	FALSE	67	+	TRUE	TRUE
GCTGAGCATCATGAAGGTGGT	siRNA69	69	TRUE	FALSE	mlo	0	FALSE	0.000504848	FALSE	68	+	FALSE	TRUE
CTGAGCATCATGAAGGTGGTG	siRNA70	70	FALSE	FALSE	mlo	0	FALSE	0.000457008	FALSE	69	+	FALSE	FALSE
TGAGCATCATGAAGGTGGTGG	siRNA71	71	TRUE	FALSE	mlo	0	FALSE	6.13535e-06	FALSE	70	+	FALSE	FALSE
GAGCATCATGAAGGTGGTGGT	siRNA72	72	FALSE	FALSE	mlo	0	FALSE	4.29902e-06	FALSE	71	+	FALSE	TRUE
AGCATCATGAAGGTGGTGGTG	siRNA73	73	FALSE	FALSE	mlo	0	FALSE	9.06592e-06	FALSE	72	+	FALSE	FALSE
GCATCATGAAGGTGGTGGTGG	siRNA74	74	TRUE	FALSE	mlo	0	FALSE	9.69868e-07	FALSE	73	+	FALSE	TRUE
CATCATGAAGGTGGTGGTGGG	siRNA75	75	FALSE	FALSE	mlo	0	FALSE	3.48742e-05	FALSE	74	+	FALSE	FALSE
ATCATGAAGGTGGTGGTGGGG	siRNA76	76	FALSE	FALSE	mlo	0	FALSE	2.89105e-05	FALSE	75	+	FALSE	FALSE
TCATGAAGGTGGTGGTGGGGC	siRNA77	77	FALSE	FALSE	mlo	0	FALSE	3.11893e-05	FALSE	76	+	FALSE	FALSE
CATGAAGGTGGTGGTGGGGCT	siRNA78	78	FALSE	FALSE	mlo	0	FALSE	0.00133106	FALSE	77	+	FALSE	FALSE
ATGAAGGTGGTGGTGGGGCTA	siRNA79	79	FALSE	FALSE	mlo	0	FALSE	0.00112728	FALSE	78	+	FALSE	FALSE
TGAAGGTGGTGGTGGGGCTAG	siRNA80	80	TRUE	FALSE	mlo	0	FALSE	0.00196542	FALSE	79	+	FALSE	FALSE
GAAGGTGGTGGTGGGGCTAGC	siRNA81	81	TRUE	FALSE	mlo	0	FALSE	0.00208972	FALSE	80	+	FALSE	TRUE
AAGGTGGTGGTGGGGCTAGCT	siRNA82	82	FALSE	FALSE	mlo	0	FALSE	0.00125448	FALSE	81	+	FALSE	FALSE
AGGTGGTGGTGGGGCTAGCTC	siRNA83	83	FALSE	FALSE	mlo	0	FALSE	0.000849171	FALSE	82	+	FALSE	FALSE
GGTGGTGGTGGGGCTAGCTCT	siRNA84	84	TRUE	FALSE	mlo	0	FALSE	0.000273744	FALSE	83	+	TRUE	TRUE
GTGGTGGTGGGGCTAGCTCTC	siRNA85	85	FALSE	FALSE	mlo	0	FALSE	0.00181253	FALSE	84	+	FALSE	FALSE
TGGTGGTGGGGCTAGCTCTCC	siRNA86	86	TRUE	TRUE	mlo	0	FALSE	0.275951	TRUE	85	+	TRUE	TRUE
GGTGGTGGGGCTAGCTCTCCA	siRNA87	87	TRUE	FALSE	mlo	0	FALSE	0.00165284	FALSE	86	+	TRUE	TRUE
GTGGTGGGGCTAGCTCTCCAG	siRNA88	88	FALSE	FALSE	mlo	0	FALSE	6.84144e-05	FALSE	87	+	FALSE	FALSE
TGGTGGGGCTAGCTCTCCAGT	siRNA89	89	TRUE	FALSE	mlo	0	FALSE	0.00186133	FALSE	88	+	FALSE	FALSE
GGTGGGGCTAGCTCTCCAGTT	siRNA90	90	TRUE	FALSE	mlo	0	FALSE	0.00200019	FALSE	89	+	TRUE	TRUE
GTGGGGCTAGCTCTCCAGTTC	siRNA91	91	TRUE	FALSE	mlo	0	FALSE	0.00333235	FALSE	90	+	TRUE	TRUE
TGGGGCTAGCTCTCCAGTTCC	siRNA92	92	TRUE	FALSE	mlo	0	FALSE	0.00341937	FALSE	91	+	TRUE	TRUE
GGGGCTAGCTCTCCAGTTCCT	siRNA93	93	TRUE	FALSE	mlo	0	FALSE	0.00352918	FALSE	92	+	TRUE	TRUE
GGGCTAGCTCTCCAGTTCCTC	siRNA94	94	TRUE	FALSE	mlo	0	FALSE	0.00387438	FALSE	93	+	FALSE	TRUE
GGCTAGCTCTCCAGTTCCTCT	siRNA95	95	TRUE	FALSE	mlo	0	FALSE	0.00658683	FALSE	94	+	TRUE	TRUE
GCTAGCTCTCCAGTTCCTCTG	siRNA96	96	TRUE	FALSE	mlo	0	FALSE	0.0118745	FALSE	95	+	FALSE	TRUE
CTAGCTCTCCAGTTCCTCTGC	siRNA97	97	FALSE	FALSE	mlo	0	FALSE	0.0106021	FALSE	96	+	FALSE	FALSE
TAGCTCTCCAGTTCCTCTGCA	siRNA98	98	FALSE	FALSE	mlo	0	FALSE	0.0148103	FALSE	97	+	FALSE	FALSE
AGCTCTCCAGTTCCTCTGCAG	siRNA99	99	FALSE	FALSE	mlo	0	FALSE	0.0138198	FALSE	98	+	FALSE	FALSE
GCTCTCCAGTTCCTCTGCAGC	siRNA100	100	TRUE	FALSE	mlo	0	FALSE	0.0184139	FALSE	99	+	FALSE	TRUE
CTCTCCAGTTCCTCTGCAGCT	siRNA101	101	FALSE	FALSE	mlo	0	FALSE	0.0217101	FALSE	100	+	FALSE	TRUE
TCTCCAGTTCCTCTGCAGCTA	siRNA102	102	FALSE	FALSE	mlo	0	FALSE	0.028719	FALSE	101	+	FALSE	FALSE
CTCCAGTTCCTCTGCAGCTAT	siRNA103	103	FALSE	FALSE	mlo	0	FALSE	0.0326653	FALSE	102	+	FALSE	FALSE
TCCAGTTCCTCTGCAGCTATA	siRNA104	104	TRUE	FALSE	mlo	0	FALSE	0.0527539	FALSE	103	+	TRUE	TRUE
CCAGTTCCTCTGCAGCTATAT	siRNA105	105	TRUE	FALSE	mlo	0	FALSE	0.0778529	FALSE	104	+	TRUE	TRUE
CAGTTCCTCTGCAGCTATATG	siRNA106	106	TRUE	FALSE	mlo	0	FALSE	0.0611118	FALSE	105	+	TRUE	TRUE
AGTTCCTCTGCAGCTATATGA	siRNA107	107	TRUE	FALSE	mlo	0	FALSE	0.094727	FALSE	106	+	TRUE	TRUE
GTTCCTCTGCAGCTATATGAC	siRNA108	108	FALSE	FALSE	mlo	0	FALSE	0.169159	TRUE	107	+	FALSE	TRUE
TTCCTCTGCAGCTATATGACC	siRNA109	109	FALSE	FALSE	mlo	0	FALSE	0.274664	TRUE	108	+	FALSE	FALSE
TCCTCTGCAGCTATATGACCT	siRNA110	110	TRUE	FALSE	mlo	0	FALSE	0.436169	TRUE	109	+	FALSE	TRUE
CCTCTGCAGCTATATGACCTT	siRNA111	111	FALSE	FALSE	mlo	0	FALSE	0.434927	TRUE	110	+	FALSE	FALSE
CTCTGCAGCTATATGACCTTC	siRNA112	112	TRUE	TRUE	mlo	0	FALSE	0.419874	TRUE	111	+	TRUE	TRUE
TCTGCAGCTATATGACCTTCC	siRNA113	113	TRUE	TRUE	mlo	0	FALSE	0.385356	TRUE	112	+	TRUE	TRUE
CTGCAGCTATATGACCTTCCC	siRNA114	114	FALSE	FALSE	mlo	0	FALSE	0.449537	TRUE	113	+	TRUE	TRUE
TGCAGCTATATGACCTTCCCC	siRNA115	115	FALSE	FALSE	mlo	0	FALSE	0.449274	TRUE	114	+	FALSE	FALSE
GCAGCTATATGACCTTCCCCC	siRNA116	116	FALSE	FALSE	mlo	0	FALSE	0.382495	TRUE	115	+	FALSE	FALSE
CAGCTATATGACCTTCCCCCT	siRNA117	117	FALSE	FALSE	mlo	0	FALSE	0.395553	TRUE	116	+	FALSE	FALSE
AGCTATATGACCTTCCCCCTC	siRNA118	118	FALSE	FALSE	mlo	0	FALSE	0.396932	TRUE	117	+	FALSE	FALSE
GCTATATGACCTTCCCCCTCT	siRNA119	119	TRUE	TRUE	mlo	0	FALSE	0.403698	TRUE	118	+	TRUE	TRUE
CTATATGACCTTCCCCCTCTA	siRNA120	120	FALSE	FALSE	mlo	0	FALSE	0.402985	TRUE	119	+	FALSE	FALSE
TATATGACCTTCCCCCTCTAC	siRNA121	121	FALSE	FALSE	mlo	0	FALSE	0.449726	TRUE	120	+	FALSE	FALSE
ATATGACCTTCCCCCTCTACG	siRNA122	122	FALSE	FALSE	mlo	0	FALSE	0.300849	TRUE	121	+	FALSE	FALSE
TATGACCTTCCCCCTCTACGC	siRNA123	123	FALSE	FALSE	mlo	0	FALSE	0.298701	TRUE	122	+	FALSE	FALSE
ATGACCTTCCCCCTCTACGCG	siRNA124	124	FALSE	FALSE	mlo	0	FALSE	0.273637	TRUE	123	+	FALSE	FALSE
TGACCTTCCCCCTCTACGCGC	siRNA125	125	FALSE	FALSE	mlo	0	FALSE	0.102174	TRUE	124	+	FALSE	FALSE
GACCTTCCCCCTCTACGCGCT	siRNA126	126	FALSE	FALSE	mlo	0	FALSE	0.0883928	FALSE	125	+	FALSE	TRUE
ACCTTCCCCCTCTACGCGCTC	siRNA127	127	FALSE	FALSE	mlo	0	FALSE	0.0795179	FALSE	126	+	FALSE	FALSE
CCTTCCCCCTCTACGCGCTCG	siRNA128	128	TRUE	FALSE	mlo	0	FALSE	0.0253178	FALSE	127	+	FALSE	TRUE
CTTCCCCCTCTACGCGCTCGT	siRNA129	129	FALSE	FALSE	mlo	0	FALSE	0.0194673	FALSE	128	+	FALSE	FALSE
TTCCCCCTCTACGCGCTCGTC	siRNA130	130	FALSE	FALSE	mlo	0	FALSE	0.0201289	FALSE	129	+	FALSE	FALSE
TCCCCCTCTACGCGCTCGTCA	siRNA131	131	TRUE	FALSE	mlo	0	FALSE	0.0191888	FALSE	130	+	TRUE	TRUE
CCCCCTCTACGCGCTCGTCAC	siRNA132	132	TRUE	FALSE	mlo	0	FALSE	0.0167765	FALSE	131	+	TRUE	TRUE
CCCCTCTACGCGCTCGTCACA	siRNA133	133	TRUE	FALSE	mlo	0	FALSE	0.0171079	FALSE	132	+	TRUE	TRUE
CCCTCTACGCGCTCGTCACAC	siRNA134	134	TRUE	FALSE	mlo	0	FALSE	0.0173006	FALSE	133	+	TRUE	TRUE
CCTCTACGCGCTCGTCACACA	siRNA135	135	TRUE	FALSE	mlo	0	FALSE	0.00729451	FALSE	134	+	TRUE	TRUE
CTCTACGCGCTCGTCACACAG	siRNA136	136	FALSE	FALSE	mlo	0	FALSE	0.00440871	FALSE	135	+	FALSE	FALSE
TCTACGCGCTCGTCACACAGA	siRNA137	137	TRUE	FALSE	mlo	0	FALSE	0.00992602	FALSE	136	+	FALSE	TRUE
CTACGCGCTCGTCACACAGAT	siRNA138	138	FALSE	FALSE	mlo	0	FALSE	0.0109273	FALSE	137	+	FALSE	FALSE
TACGCGCTCGTCACACAGATG	siRNA139	139	TRUE	FALSE	mlo	0	FALSE	0.00860451	FALSE	138	+	FALSE	TRUE
ACGCGCTCGTCACACAGATGG	siRNA140	140	TRUE	FALSE	mlo	0	FALSE	0.00037083	FALSE	139	+	TRUE	TRUE
CGCGCTCGTCACACAGATGGG	siRNA141	141	TRUE	FALSE	mlo	0	FALSE	8.66922e-05	FALSE	140	+	TRUE	TRUE
GCGCTCGTCACACAGATGGGA	siRNA142	142	TRUE	FALSE	mlo	0	FALSE	0.000100956	FALSE	141	+	TRUE	TRUE
CGCTCGTCACACAGATGGGAT	siRNA143	143	FALSE	FALSE	mlo	0	FALSE	0.000206491	FALSE	142	+	FALSE	FALSE
GCTCGTCACACAGATGGGATC	siRNA144	144	TRUE	FALSE	mlo	0	FALSE	0.000910188	FALSE	143	+	TRUE	TRUE
CTCGTCACACAGATGGGATCA	siRNA145	145	TRUE	FALSE	mlo	0	FALSE	0.00190935	FALSE	144	+	TRUE	TRUE
TCGTCACACAGATGGGATCAA	siRNA146	146	TRUE	FALSE	mlo	0	FALSE	0.00259458	FALSE	145	+	FALSE	TRUE
CGTCACACAGATGGGATCAAA	siRNA147	147	TRUE	FALSE	mlo	0	FALSE	0.0213783	FALSE	146	+	TRUE	TRUE
GTCACACAGATGGGATCAAAC	siRNA148	148	TRUE	FALSE	mlo	0	FALSE	0.0155181	FALSE	147	+	TRUE	TRUE
TCACACAGATGGGATCAAACA	siRNA149	149	TRUE	TRUE	mlo	0	FALSE	0.35266	TRUE	148	+	TRUE	TRUE
CACACAGATGGGATCAAACAT	siRNA150	150	FALSE	FALSE	mlo	0	FALSE	0.156414	TRUE	149	+	TRUE	TRUE
ACACAGATGGGATCAAACATG	siRNA151	151	TRUE	FALSE	mlo	0	FALSE	0.0244311	FALSE	150	+	FALSE	TRUE
CACAGATGGGATCAAACATGA	siRNA152	152	TRUE	TRUE	mlo	0	FALSE	0.254384	TRUE	151	+	TRUE	TRUE
ACAGATGGGATCAAACATGAA	siRNA153	153	TRUE	FALSE	mlo	0	FALSE	0.248467	TRUE	152	+	FALSE	TRUE
CAGATGGGATCAAACATGAAG	siRNA154	154	TRUE	FALSE	mlo	0	FALSE	0.212609	TRUE	153	+	FALSE	TRUE
AGATGGGATCAAACATGAAGA	siRNA155	155	TRUE	TRUE	mlo	0	FALSE	0.209008	TRUE	154	+	FALSE	TRUE
GATGGGATCAAACATGAAGAG	siRNA156	156	FALSE	FALSE	mlo	0	FALSE	0.00276389	FALSE	155	+	FALSE	TRUE
ATGGGATCAAACATGAAGAGG	siRNA157	157	FALSE	FALSE	mlo	0	FALSE	0.0016663	FALSE	156	+	FALSE	FALSE
TGGGATCAAACATGAAGAGGT	siRNA158	158	FALSE	FALSE	mlo	0	FALSE	0.00105544	FALSE	157	+	FALSE	FALSE
GGGATCAAACATGAAGAGGTC	siRNA159	159	TRUE	FALSE	mlo	0	FALSE	0.0015187	FALSE	158	+	TRUE	TRUE
GGATCAAACATGAAGAGGTCC	siRNA160	160	TRUE	FALSE	mlo	0	FALSE	0.00213038	FALSE	159	+	FALSE	TRUE
GATCAAACATGAAGAGGTCCA	siRNA161	161	FALSE	FALSE	mlo	0	FALSE	0.00201079	FALSE	160	+	FALSE	FALSE
ATCAAACATGAAGAGGTCCAT	siRNA162	162	FALSE	FALSE	mlo	0	FALSE	0.00585031	FALSE	161	+	FALSE	FALSE
TCAAACATGAAGAGGTCCATC	siRNA163	163	TRUE	FALSE	mlo	0	FALSE	8.77303e-05	FALSE	162	+	FALSE	FALSE
CAAACATGAAGAGGTCCATCT	siRNA164	164	TRUE	FALSE	mlo	0	FALSE	0.000651651	FALSE	163	+	TRUE	TRUE
AAACATGAAGAGGTCCATCTT	siRNA165	165	FALSE	FALSE	mlo	0	FALSE	0.000426569	FALSE	164	+	FALSE	FALSE
AACATGAAGAGGTCCATCTTC	siRNA166	166	FALSE	FALSE	mlo	0	FALSE	0.000220673	FALSE	165	+	FALSE	FALSE
ACATGAAGAGGTCCATCTTCG	siRNA167	167	TRUE	FALSE	mlo	0	FALSE	0.000222153	FALSE	166	+	FALSE	TRUE
CATGAAGAGGTCCATCTTCGA	siRNA168	168	FALSE	FALSE	mlo	0	FALSE	0.00140771	FALSE	167	+	FALSE	FALSE
ATGAAGAGGTCCATCTTCGAC	siRNA169	169	FALSE	FALSE	mlo	0	FALSE	0.00148688	FALSE	168	+	FALSE	FALSE
TGAAGAGGTCCATCTTCGACG	siRNA170	170	TRUE	FALSE	mlo	0	FALSE	0.000259284	FALSE	169	+	FALSE	FALSE
GAAGAGGTCCATCTTCGACGA	siRNA171	171	FALSE	FALSE	mlo	0	FALSE	0.00253951	FALSE	170	+	FALSE	FALSE
AAGAGGTCCATCTTCGACGAG	siRNA172	172	FALSE	FALSE	mlo	0	FALSE	0.00475769	FALSE	171	+	FALSE	FALSE
AGAGGTCCATCTTCGACGAGC	siRNA173	173	TRUE	FALSE	mlo	0	FALSE	0.00605654	FALSE	172	+	FALSE	FALSE
GAGGTCCATCTTCGACGAGCA	siRNA174	174	FALSE	FALSE	mlo	0	FALSE	0.0289258	FALSE	173	+	FALSE	TRUE
AGGTCCATCTTCGACGAGCAG	siRNA175	175	FALSE	FALSE	mlo	0	FALSE	0.0512488	FALSE	174	+	FALSE	FALSE
GGTCCATCTTCGACGAGCAGA	siRNA176	176	TRUE	FALSE	mlo	0	FALSE	0.0426922	FALSE	175	+	FALSE	TRUE
GTCCATCTTCGACGAGCAGAC	siRNA177	177	FALSE	FALSE	mlo	0	FALSE	0.012186	FALSE	176	+	FALSE	TRUE
TCCATCTTCGACGAGCAGACG	siRNA178	178	TRUE	FALSE	mlo	0	FALSE	0.0029508	FALSE	177	+	TRUE	TRUE
CCATCTTCGACGAGCAGACGT	siRNA179	179	FALSE	FALSE	mlo	0	FALSE	0.00051976	FALSE	178	+	FALSE	FALSE
CATCTTCGACGAGCAGACGTC	siRNA180	180	FALSE	FALSE	mlo	0	FALSE	7.50568e-05	FALSE	179	+	FALSE	FALSE
ATCTTCGACGAGCAGACGTCC	siRNA181	181	FALSE	FALSE	mlo	0	FALSE	0.00448229	FALSE	180	+	FALSE	FALSE
TCTTCGACGAGCAGACGTCCA	siRNA182	182	FALSE	FALSE	mlo	0	FALSE	0.00447701	FALSE	181	+	FALSE	FALSE
CTTCGACGAGCAGACGTCCAA	siRNA183	183	FALSE	FALSE	mlo	0	FALSE	0.00502817	FALSE	182	+	FALSE	FALSE
TTCGACGAGCAGACGTCCAAG	siRNA184	184	FALSE	FALSE	mlo	0	FALSE	0.00499968	FALSE	183	+	FALSE	FALSE
TCGACGAGCAGACGTCCAAGG	siRNA185	185	TRUE	FALSE	mlo	0	FALSE	0.00528463	FALSE	184	+	TRUE	TRUE
CGACGAGCAGACGTCCAAGGC	siRNA186	186	TRUE	FALSE	mlo	0	FALSE	0.00689749	FALSE	185	+	TRUE	TRUE
GACGAGCAGACGTCCAAGGCG	siRNA187	187	FALSE	FALSE	mlo	0	FALSE	0.006914	FALSE	186	+	TRUE	TRUE
ACGAGCAGACGTCCAAGGCGC	siRNA188	188	FALSE	FALSE	mlo	0	FALSE	0.00883879	FALSE	187	+	FALSE	FALSE
CGAGCAGACGTCCAAGGCGCT	siRNA189	189	FALSE	FALSE	mlo	0	FALSE	0.00428268	FALSE	188	+	FALSE	FALSE
GAGCAGACGTCCAAGGCGCTC	siRNA190	190	FALSE	FALSE	mlo	0	FALSE	0.00441638	FALSE	189	+	FALSE	FALSE
AGCAGACGTCCAAGGCGCTCA	siRNA191	191	TRUE	FALSE	mlo	0	FALSE	0.0053148	FALSE	190	+	FALSE	TRUE
GCAGACGTCCAAGGCGCTCAC	siRNA192	192	TRUE	FALSE	mlo	0	FALSE	0.00354982	FALSE	191	+	FALSE	TRUE
CAGACGTCCAAGGCGCTCACC	siRNA193	193	TRUE	FALSE	mlo	0	FALSE	0.00385154	FALSE	192	+	FALSE	TRUE
AGACGTCCAAGGCGCTCACCA	siRNA194	194	FALSE	FALSE	mlo	0	FALSE	0.00587002	FALSE	193	+	FALSE	FALSE
GACGTCCAAGGCGCTCACCAA	siRNA195	195	FALSE	FALSE	mlo	0	FALSE	0.0228345	FALSE	194	+	FALSE	FALSE
ACGTCCAAGGCGCTCACCAAC	siRNA196	196	TRUE	FALSE	mlo	0	FALSE	0.0127742	FALSE	195	+	FALSE	FALSE
CGTCCAAGGCGCTCACCAACT	siRNA197	197	TRUE	FALSE	mlo	0	FALSE	0.0729471	FALSE	196	+	TRUE	TRUE
GTCCAAGGCGCTCACCAACTG	siRNA198	198	FALSE	FALSE	mlo	0	FALSE	0.015523	FALSE	197	+	TRUE	TRUE
TCCAAGGCGCTCACCAACTGG	siRNA199	199	TRUE	FALSE	mlo	0	FALSE	0.00289577	FALSE	198	+	TRUE	TRUE
CCAAGGCGCTCACCAACTGGC	siRNA200	200	TRUE	FALSE	mlo	0	FALSE	0.00144086	FALSE	199	+	FALSE	TRUE
CAAGGCGCTCACCAACTGGCG	siRNA201	201	FALSE	FALSE	mlo	0	FALSE	0.000835576	FALSE	200	+	FALSE	FALSE
AAGGCGCTCACCAACTGGCGG	siRNA202	202	FALSE	FALSE	mlo	0	FALSE	0.000580478	FALSE	201	+	FALSE	FALSE
AGGCGCTCACCAACTGGCGGA	siRNA203	203	FALSE	FALSE	mlo	0	FALSE	0.000416942	FALSE	202	+	FALSE	FALSE
GGCGCTCACCAACTGGCGGAA	siRNA204	204	TRUE	FALSE	mlo	0	FALSE	0.000251913	FALSE	203	+	TRUE	TRUE
GCGCTCACCAACTGGCGGAAC	siRNA205	205	TRUE	FALSE	mlo	0	FALSE	8.74453e-05	FALSE	204	+	FALSE	TRUE
CGCTCACCAACTGGCGGAACA	siRNA206	206	TRUE	FALSE	mlo	0	FALSE	0.00808795	FALSE	205	+	TRUE	TRUE
GCTCACCAACTGGCGGAACAC	siRNA207	207	TRUE	FALSE	mlo	0	FALSE	0.000857429	FALSE	206	+	TRUE	TRUE
CTCACCAACTGGCGGAACACG	siRNA208	208	TRUE	TRUE	mlo	0	FALSE	0.32399	TRUE	207	+	TRUE	TRUE
TCACCAACTGGCGGAACACGG	siRNA209	209	FALSE	FALSE	mlo	0	FALSE	0.00598625	FALSE	208	+	FALSE	FALSE
CACCAACTGGCGGAACACGGC	siRNA210	210	FALSE	FALSE	mlo	0	FALSE	0.00449643	FALSE	209	+	FALSE	TRUE
ACCAACTGGCGGAACACGGCC	siRNA211	211	FALSE	FALSE	mlo	0	FALSE	0.00944032	FALSE	210	+	FALSE	FALSE
CCAACTGGCGGAACACGGCCA	siRNA212	212	FALSE	FALSE	mlo	0	FALSE	0.015425	FALSE	211	+	FALSE	FALSE
CAACTGGCGGAACACGGCCAA	siRNA213	213	FALSE	FALSE	mlo	0	FALSE	0.0226653	FALSE	212	+	FALSE	FALSE
AACTGGCGGAACACGGCCAAG	siRNA214	214	FALSE	FALSE	mlo	0	FALSE	0.0276588	FALSE	213	+	FALSE	FALSE
ACTGGCGGAACACGGCCAAGG	siRNA215	215	TRUE	FALSE	mlo	0	FALSE	0.0082008	FALSE	214	+	FALSE	TRUE
CTGGCGGAACACGGCCAAGGA	siRNA216	216	FALSE	FALSE	mlo	0	FALSE	0.0111823	FALSE	215	+	TRUE	TRUE
TGGCGGAACACGGCCAAGGAG	siRNA217	217	FALSE	FALSE	mlo	0	FALSE	0.0200944	FALSE	216	+	FALSE	FALSE
GGCGGAACACGGCCAAGGAGA	siRNA218	218	TRUE	FALSE	mlo	0	FALSE	0.0618906	FALSE	217	+	TRUE	TRUE
GCGGAACACGGCCAAGGAGAA	siRNA219	219	TRUE	FALSE	mlo	0	FALSE	0.0790807	FALSE	218	+	TRUE	TRUE
CGGAACACGGCCAAGGAGAAG	siRNA220	220	TRUE	TRUE	mlo	0	FALSE	0.112218	TRUE	219	+	TRUE	TRUE
GGAACACGGCCAAGGAGAAGA	siRNA221	221	TRUE	TRUE	mlo	0	FALSE	0.112927	TRUE	220	+	TRUE	TRUE
GAACACGGCCAAGGAGAAGAA	siRNA222	222	FALSE	FALSE	mlo	0	FALSE	0.145943	TRUE	221	+	FALSE	FALSE
AACACGGCCAAGGAGAAGAAG	siRNA223	223	FALSE	FALSE	mlo	0	FALSE	0.329378	TRUE	222	+	FALSE	FALSE
ACACGGCCAAGGAGAAGAAGA	siRNA224	224	TRUE	TRUE	mlo	0	FALSE	0.386178	TRUE	223	+	FALSE	FALSE
CACGGCCAAGGAGAAGAAGAA	siRNA225	225	FALSE	FALSE	mlo	0	FALSE	0.432416	TRUE	224	+	TRUE	TRUE
ACGGCCAAGGAGAAGAAGAAA	siRNA226	226	TRUE	TRUE	mlo	0	FALSE	0.496723	TRUE	225	+	FALSE	TRUE
CGGCCAAGGAGAAGAAGAAAG	siRNA227	227	TRUE	TRUE	mlo	0	FALSE	0.118999	TRUE	226	+	TRUE	TRUE
GGCCAAGGAGAAGAAGAAAGT	siRNA228	228	TRUE	FALSE	mlo	0	FALSE	0.0429566	FALSE	227	+	TRUE	TRUE
GCCAAGGAGAAGAAGAAAGTC	siRNA229	229	TRUE	FALSE	mlo	0	FALSE	0.0187146	FALSE	228	+	TRUE	TRUE
CCAAGGAGAAGAAGAAAGTCC	siRNA230	230	TRUE	FALSE	mlo	0	FALSE	0.0113445	FALSE	229	+	TRUE	TRUE
CAAGGAGAAGAAGAAAGTCCG	siRNA231	231	FALSE	FALSE	mlo	0	FALSE	0.00871534	FALSE	230	+	FALSE	FALSE
AAGGAGAAGAAGAAAGTCCGA	siRNA232	232	FALSE	FALSE	mlo	0	FALSE	0.00629536	FALSE	231	+	FALSE	FALSE
AGGAGAAGAAGAAAGTCCGAG	siRNA233	233	FALSE	FALSE	mlo	0	FALSE	0.00388922	FALSE	232	+	FALSE	FALSE
GGAGAAGAAGAAAGTCCGAGA	siRNA234	234	TRUE	FALSE	mlo	0	FALSE	0.00150106	FALSE	233	+	TRUE	TRUE
GAGAAGAAGAAAGTCCGAGAC	siRNA235	235	FALSE	FALSE	mlo	0	FALSE	0.000439053	FALSE	234	+	FALSE	FALSE
AGAAGAAGAAAGTCCGAGACA	siRNA236	236	TRUE	FALSE	mlo	0	FALSE	0.0003771	FALSE	235	+	FALSE	FALSE
GAAGAAGAAAGTCCGAGACAC	siRNA237	237	FALSE	FALSE	mlo	0	FALSE	0.00226533	FALSE	236	+	FALSE	FALSE
AAGAAGAAAGTCCGAGACACG	siRNA238	238	FALSE	FALSE	mlo	0	FALSE	0.00470513	FALSE	237	+	FALSE	FALSE
AGAAGAAAGTCCGAGACACGG	siRNA239	239	FALSE	FALSE	mlo	0	FALSE	0.0140385	FALSE	238	+	FALSE	FALSE
GAAGAAAGTCCGAGACACGGA	siRNA240	240	FALSE	FALSE	mlo	0	FALSE	0.0168766	FALSE	239	+	FALSE	FALSE
AAGAAAGTCCGAGACACGGAC	siRNA241	241	FALSE	FALSE	mlo	0	FALSE	0.00402707	FALSE	240	+	FALSE	FALSE
AGAAAGTCCGAGACACGGACA	siRNA242	242	TRUE	FALSE	mlo	0	FALSE	0.0059587	FALSE	241	+	FALSE	FALSE
GAAAGTCCGAGACACGGACAT	siRNA243	243	FALSE	FALSE	mlo	0	FALSE	0.00208529	FALSE	242	+	FALSE	FALSE
AAAGTCCGAGACACGGACATG	siRNA244	244	FALSE	FALSE	mlo	0	FALSE	0.000178984	FALSE	243	+	FALSE	FALSE
AAGTCCGAGACACGGACATGC	siRNA245	245	FALSE	FALSE	mlo	0	FALSE	2.59459e-05	FALSE	244	+	FALSE	FALSE
AGTCCGAGACACGGACATGCT	siRNA246	246	TRUE	FALSE	mlo	0	FALSE	3.1391e-05	FALSE	245	+	FALSE	TRUE
GTCCGAGACACGGACATGCTG	siRNA247	247	FALSE	FALSE	mlo	0	FALSE	2.6969e-05	FALSE	246	+	FALSE	FALSE
TCCGAGACACGGACATGCTGA	siRNA248	248	TRUE	FALSE	mlo	0	FALSE	5.65837e-05	FALSE	247	+	FALSE	FALSE
CCGAGACACGGACATGCTGAT	siRNA249	249	TRUE	FALSE	mlo	0	FALSE	0.00715403	FALSE	248	+	TRUE	TRUE
CGAGACACGGACATGCTGATG	siRNA250	250	TRUE	FALSE	mlo	0	FALSE	0.00497778	FALSE	249	+	TRUE	TRUE
GAGACACGGACATGCTGATGG	siRNA251	251	TRUE	FALSE	mlo	0	FALSE	0.00413492	FALSE	250	+	TRUE	TRUE
AGACACGGACATGCTGATGGC	siRNA252	252	FALSE	FALSE	mlo	0	FALSE	0.0011232	FALSE	251	+	FALSE	FALSE
GACACGGACATGCTGATGGCT	siRNA253	253	FALSE	FALSE	mlo	0	FALSE	0.00484968	FALSE	252	+	FALSE	TRUE
ACACGGACATGCTGATGGCTC	siRNA254	254	FALSE	FALSE	mlo	0	FALSE	0.0111436	FALSE	253	+	FALSE	FALSE
CACGGACATGCTGATGGCTCA	siRNA255	255	FALSE	FALSE	mlo	0	FALSE	0.0174988	FALSE	254	+	FALSE	FALSE
ACGGACATGCTGATGGCTCAG	siRNA256	256	FALSE	FALSE	mlo	0	FALSE	0.023941	FALSE	255	+	FALSE	FALSE
CGGACATGCTGATGGCTCAGA	siRNA257	257	TRUE	FALSE	mlo	0	FALSE	0.0635555	FALSE	256	+	TRUE	TRUE
GGACATGCTGATGGCTCAGAT	siRNA258	258	TRUE	FALSE	mlo	0	FALSE	0.0730449	FALSE	257	+	TRUE	TRUE
GACATGCTGATGGCTCAGATG	siRNA259	259	TRUE	FALSE	mlo	0	FALSE	0.0758709	FALSE	258	+	TRUE	TRUE
ACATGCTGATGGCTCAGATGA	siRNA260	260	TRUE	FALSE	mlo	0	FALSE	0.00667836	FALSE	259	+	FALSE	FALSE
CATGCTGATGGCTCAGATGAT	siRNA261	261	FALSE	FALSE	mlo	0	FALSE	0.00164494	FALSE	260	+	FALSE	FALSE
ATGCTGATGGCTCAGATGATC	siRNA262	262	FALSE	FALSE	mlo	0	FALSE	0.0211539	FALSE	261	+	FALSE	FALSE
TGCTGATGGCTCAGATGATCG	siRNA263	263	TRUE	FALSE	mlo	0	FALSE	0.00544363	FALSE	262	+	TRUE	TRUE
GCTGATGGCTCAGATGATCGG	siRNA264	264	TRUE	FALSE	mlo	0	FALSE	0.000219702	FALSE	263	+	TRUE	TRUE
CTGATGGCTCAGATGATCGGC	siRNA265	265	FALSE	FALSE	mlo	0	FALSE	4.9316e-05	FALSE	264	+	FALSE	FALSE
TGATGGCTCAGATGATCGGCG	siRNA266	266	FALSE	FALSE	mlo	0	FALSE	4.75381e-05	FALSE	265	+	FALSE	FALSE
GATGGCTCAGATGATCGGCGA	siRNA267	267	FALSE	FALSE	mlo	0	FALSE	0.000141779	FALSE	266	+	FALSE	FALSE
ATGGCTCAGATGATCGGCGAC	siRNA268	268	FALSE	FALSE	mlo	0	FALSE	0.000135556	FALSE	267	+	FALSE	FALSE
TGGCTCAGATGATCGGCGACG	siRNA269	269	TRUE	FALSE	mlo	0	FALSE	0.000148826	FALSE	268	+	FALSE	TRUE
GGCTCAGATGATCGGCGACGC	siRNA270	270	TRUE	FALSE	mlo	0	FALSE	0.000400097	FALSE	269	+	TRUE	TRUE
GCTCAGATGATCGGCGACGCA	siRNA271	271	TRUE	FALSE	mlo	0	FALSE	0.00193959	FALSE	270	+	TRUE	TRUE
CTCAGATGATCGGCGACGCAA	siRNA272	272	FALSE	FALSE	mlo	0	FALSE	0.018514	FALSE	271	+	FALSE	FALSE
TCAGATGATCGGCGACGCAAC	siRNA273	273	TRUE	FALSE	mlo	0	FALSE	0.0651992	FALSE	272	+	FALSE	FALSE
CAGATGATCGGCGACGCAACA	siRNA274	274	TRUE	TRUE	mlo	0	FALSE	0.161124	TRUE	273	+	TRUE	TRUE
AGATGATCGGCGACGCAACAC	siRNA275	275	FALSE	FALSE	mlo	0	FALSE	0.248832	TRUE	274	+	FALSE	FALSE
GATGATCGGCGACGCAACACC	siRNA276	276	TRUE	FALSE	mlo	0	FALSE	0.351431	TRUE	275	+	FALSE	TRUE
ATGATCGGCGACGCAACACCG	siRNA277	277	FALSE	FALSE	mlo	0	FALSE	0.0740668	FALSE	276	+	FALSE	FALSE
TGATCGGCGACGCAACACCGA	siRNA278	278	FALSE	FALSE	mlo	0	FALSE	0.0114511	FALSE	277	+	FALSE	FALSE
GATCGGCGACGCAACACCGAG	siRNA279	279	FALSE	FALSE	mlo	0	FALSE	0.000295975	FALSE	278	+	FALSE	FALSE
ATCGGCGACGCAACACCGAGC	siRNA280	280	FALSE	FALSE	mlo	0	FALSE	0.000159895	FALSE	279	+	FALSE	FALSE
TCGGCGACGCAACACCGAGCC	siRNA281	281	FALSE	FALSE	mlo	0	FALSE	0.0013138	FALSE	280	+	FALSE	FALSE
CGGCGACGCAACACCGAGCCG	siRNA282	282	TRUE	FALSE	mlo	0	FALSE	0.000417147	FALSE	281	+	TRUE	TRUE
GGCGACGCAACACCGAGCCGA	siRNA283	283	TRUE	FALSE	mlo	0	FALSE	0.000567203	FALSE	282	+	FALSE	TRUE
GCGACGCAACACCGAGCCGAG	siRNA284	284	FALSE	FALSE	mlo	0	FALSE	9.42608e-05	FALSE	283	+	FALSE	FALSE
CGACGCAACACCGAGCCGAGG	siRNA285	285	TRUE	FALSE	mlo	0	FALSE	4.61591e-05	FALSE	284	+	FALSE	FALSE
GACGCAACACCGAGCCGAGGC	siRNA286	286	FALSE	FALSE	mlo	0	FALSE	5.46139e-05	FALSE	285	+	FALSE	TRUE
ACGCAACACCGAGCCGAGGCT	siRNA287	287	FALSE	FALSE	mlo	0	FALSE	4.92935e-05	FALSE	286	+	FALSE	FALSE
CGCAACACCGAGCCGAGGCTC	siRNA288	288	FALSE	FALSE	mlo	0	FALSE	1.68991e-05	FALSE	287	+	FALSE	FALSE
GCAACACCGAGCCGAGGCTCG	siRNA289	289	TRUE	FALSE	mlo	0	FALSE	1.76423e-06	FALSE	288	+	TRUE	TRUE
CAACACCGAGCCGAGGCTCGT	siRNA290	290	FALSE	FALSE	mlo	0	FALSE	3.70945e-06	FALSE	289	+	FALSE	FALSE
AACACCGAGCCGAGGCTCGTC	siRNA291	291	FALSE	FALSE	mlo	0	FALSE	6.28703e-06	FALSE	290	+	FALSE	FALSE
ACACCGAGCCGAGGCTCGTCG	siRNA292	292	TRUE	FALSE	mlo	0	FALSE	4.46746e-06	FALSE	291	+	FALSE	FALSE
CACCGAGCCGAGGCTCGTCGC	siRNA293	293	FALSE	FALSE	mlo	0	FALSE	7.7887e-05	FALSE	292	+	FALSE	FALSE
ACCGAGCCGAGGCTCGTCGCC	siRNA294	294	TRUE	FALSE	mlo	0	FALSE	0.000431314	FALSE	293	+	TRUE	TRUE
CCGAGCCGAGGCTCGTCGCCG	siRNA295	295	FALSE	FALSE	mlo	0	FALSE	0.000142291	FALSE	294	+	FALSE	FALSE
CGAGCCGAGGCTCGTCGCCGA	siRNA296	296	FALSE	FALSE	mlo	0	FALSE	0.000513534	FALSE	295	+	FALSE	FALSE
GAGCCGAGGCTCGTCGCCGAT	siRNA297	297	FALSE	FALSE	mlo	0	FALSE	0.00589636	FALSE	296	+	FALSE	FALSE
AGCCGAGGCTCGTCGCCGATG	siRNA298	298	TRUE	FALSE	mlo	0	FALSE	0.00596814	FALSE	297	+	FALSE	TRUE
GCCGAGGCTCGTCGCCGATGC	siRNA299	299	TRUE	FALSE	mlo	0	FALSE	0.00628711	FALSE	298	+	TRUE	TRUE
CCGAGGCTCGTCGCCGATGCC	siRNA300	300	TRUE	FALSE	mlo	0	FALSE	0.00152123	FALSE	299	+	TRUE	TRUE
CGAGGCTCGTCGCCGATGCCG	siRNA301	301	FALSE	FALSE	mlo	0	FALSE	0.000137287	FALSE	300	+	FALSE	FALSE
GAGGCTCGTCGCCGATGCCGA	siRNA302	302	FALSE	FALSE	mlo	0	FALSE	0.000483884	FALSE	301	+	FALSE	FALSE
AGGCTCGTCGCCGATGCCGAG	siRNA303	303	FALSE	FALSE	mlo	0	FALSE	0.00348292	FALSE	302	+	FALSE	FALSE
GGCTCGTCGCCGATGCCGAGC	siRNA304	304	TRUE	FALSE	mlo	0	FALSE	0.00606647	FALSE	303	+	TRUE	TRUE
GCTCGTCGCCGATGCCGAGCC	siRNA305	305	TRUE	FALSE	mlo	0	FALSE	0.00363969	FALSE	304	+	TRUE	TRUE
CTCGTCGCCGATGCCGAGCCG	siRNA306	306	FALSE	FALSE	mlo	0	FALSE	0.00111688	FALSE	305	+	FALSE	FALSE
TCGTCGCCGATGCCGAGCCGG	siRNA307	307	FALSE	FALSE	mlo	0	FALSE	4.65873e-05	FALSE	306	+	FALSE	FALSE
CGTCGCCGATGCCGAGCCGGG	siRNA308	308	FALSE	FALSE	mlo	0	FALSE	2.942e-05	FALSE	307	+	FALSE	FALSE
GTCGCCGATGCCGAGCCGGGG	siRNA309	309	FALSE	FALSE	mlo	0	FALSE	1.14911e-05	FALSE	308	+	FALSE	FALSE
TCGCCGATGCCGAGCCGGGGC	siRNA310	310	FALSE	FALSE	mlo	0	FALSE	1.10806e-05	FALSE	309	+	FALSE	FALSE
CGCCGATGCCGAGCCGGGGCT	siRNA311	311	TRUE	FALSE	mlo	0	FALSE	2.15698e-05	FALSE	310	+	FALSE	TRUE
GCCGATGCCGAGCCGGGGCTC	siRNA312	312	TRUE	FALSE	mlo	0	FALSE	3.86864e-05	FALSE	311	+	FALSE	TRUE
CCGATGCCGAGCCGGGGCTCA	siRNA313	313	TRUE	FALSE	mlo	0	FALSE	0.000598302	FALSE	312	+	TRUE	TRUE
CGATGCCGAGCCGGGGCTCAT	siRNA314	314	FALSE	FALSE	mlo	0	FALSE	0.00132105	FALSE	313	+	FALSE	FALSE
GATGCCGAGCCGGGGCTCATC	siRNA315	315	TRUE	FALSE	mlo	0	FALSE	0.0160614	FALSE	314	+	FALSE	TRUE
ATGCCGAGCCGGGGCTCATCA	siRNA316	316	TRUE	FALSE	mlo	0	FALSE	0.477009	TRUE	315	+	FALSE	TRUE
TGCCGAGCCGGGGCTCATCAC	siRNA317	317	TRUE	FALSE	mlo	0	FALSE	0.00313388	FALSE	316	+	FALSE	TRUE
GCCGAGCCGGGGCTCATCACC	siRNA318	318	TRUE	FALSE	mlo	0	FALSE	0.00724172	FALSE	317	+	TRUE	TRUE
CCGAGCCGGGGCTCATCACCC	siRNA319	319	TRUE	FALSE	mlo	0	FALSE	0.00569656	FALSE	318	+	FALSE	TRUE
CGAGCCGGGGCTCATCACCCG	siRNA320	320	FALSE	FALSE	mlo	0	FALSE	0.0153426	FALSE	319	+	FALSE	FALSE
GAGCCGGGGCTCATCACCCGT	siRNA321	321	FALSE	FALSE	mlo	0	FALSE	0.0128557	FALSE	320	+	FALSE	FALSE
AGCCGGGGCTCATCACCCGTG	siRNA322	322	FALSE	FALSE	mlo	0	FALSE	0.00336046	FALSE	321	+	FALSE	FALSE
GCCGGGGCTCATCACCCGTGC	siRNA323	323	TRUE	FALSE	mlo	0	FALSE	2.12194e-05	FALSE	322	+	TRUE	TRUE
CCGGGGCTCATCACCCGTGCA	siRNA324	324	TRUE	FALSE	mlo	0	FALSE	1.29148e-05	FALSE	323	+	TRUE	TRUE
CGGGGCTCATCACCCGTGCAC	siRNA325	325	TRUE	FALSE	mlo	0	FALSE	4.93419e-06	FALSE	324	+	FALSE	TRUE
GGGGCTCATCACCCGTGCACC	siRNA326	326	TRUE	FALSE	mlo	0	FALSE	6.95175e-06	FALSE	325	+	TRUE	TRUE
GGGCTCATCACCCGTGCACCT	siRNA327	327	TRUE	FALSE	mlo	0	FALSE	0.000223273	FALSE	326	+	TRUE	TRUE
GGCTCATCACCCGTGCACCTG	siRNA328	328	TRUE	FALSE	mlo	0	FALSE	0.000206162	FALSE	327	+	TRUE	TRUE
GCTCATCACCCGTGCACCTGC	siRNA329	329	TRUE	FALSE	mlo	0	FALSE	4.78753e-05	FALSE	328	+	FALSE	TRUE
CTCATCACCCGTGCACCTGCT	siRNA330	330	FALSE	FALSE	mlo	0	FALSE	0.000210666	FALSE	329	+	FALSE	TRUE
TCATCACCCGTGCACCTGCTT	siRNA331	331	FALSE	FALSE	mlo	0	FALSE	0.00591384	FALSE	330	+	FALSE	FALSE
CATCACCCGTGCACCTGCTTC	siRNA332	332	FALSE	FALSE	mlo	0	FALSE	0.00516449	FALSE	331	+	FALSE	FALSE
ATCACCCGTGCACCTGCTTCA	siRNA333	333	TRUE	FALSE	mlo	0	FALSE	0.00516352	FALSE	332	+	TRUE	TRUE
TCACCCGTGCACCTGCTTCAC	siRNA334	334	FALSE	FALSE	mlo	0	FALSE	0.00490565	FALSE	333	+	FALSE	FALSE
CACCCGTGCACCTGCTTCACA	siRNA335	335	TRUE	TRUE	mlo	0	FALSE	0.85207	TRUE	334	+	TRUE	TRUE
ACCCGTGCACCTGCTTCACAA	siRNA336	336	FALSE	FALSE	mlo	0	FALSE	0.018153	FALSE	335	+	FALSE	FALSE
CCCGTGCACCTGCTTCACAAG	siRNA337	337	TRUE	FALSE	mlo	0	FALSE	0.00977592	FALSE	336	+	TRUE	TRUE
CCGTGCACCTGCTTCACAAGG	siRNA338	338	TRUE	FALSE	mlo	0	FALSE	0.00109173	FALSE	337	+	TRUE	TRUE
CGTGCACCTGCTTCACAAGGG	siRNA339	339	TRUE	FALSE	mlo	0	FALSE	0.00100469	FALSE	338	+	TRUE	TRUE
GTGCACCTGCTTCACAAGGGC	siRNA340	340	FALSE	FALSE	mlo	0	FALSE	0.00114955	FALSE	339	+	FALSE	TRUE
TGCACCTGCTTCACAAGGGCA	siRNA341	341	FALSE	FALSE	mlo	0	FALSE	0.0013274	FALSE	340	+	FALSE	FALSE
GCACCTGCTTCACAAGGGCAT	siRNA342	342	FALSE	FALSE	mlo	0	FALSE	0.000142914	FALSE	341	+	FALSE	FALSE
CACCTGCTTCACAAGGGCATG	siRNA343	343	FALSE	FALSE	mlo	0	FALSE	6.42042e-06	FALSE	342	+	FALSE	FALSE
ACCTGCTTCACAAGGGCATGG	siRNA344	344	TRUE	FALSE	mlo	0	FALSE	4.53613e-08	FALSE	343	+	TRUE	TRUE
CCTGCTTCACAAGGGCATGGG	siRNA345	345	TRUE	FALSE	mlo	0	FALSE	1.65357e-08	FALSE	344	+	TRUE	TRUE
CTGCTTCACAAGGGCATGGGG	siRNA346	346	FALSE	FALSE	mlo	0	FALSE	7.85343e-10	FALSE	345	+	FALSE	FALSE
TGCTTCACAAGGGCATGGGGC	siRNA347	347	FALSE	FALSE	mlo	0	FALSE	1.75964e-09	FALSE	346	+	FALSE	FALSE
GCTTCACAAGGGCATGGGGCG	siRNA348	348	FALSE	FALSE	mlo	0	FALSE	8.80521e-11	FALSE	347	+	FALSE	FALSE
CTTCACAAGGGCATGGGGCGG	siRNA349	349	FALSE	FALSE	mlo	0	FALSE	2.2167e-10	FALSE	348	+	FALSE	FALSE
TTCACAAGGGCATGGGGCGGT	siRNA350	350	FALSE	FALSE	mlo	0	FALSE	4.38024e-10	FALSE	349	+	FALSE	FALSE
TCACAAGGGCATGGGGCGGTC	siRNA351	351	FALSE	FALSE	mlo	0	FALSE	1.82871e-08	FALSE	350	+	FALSE	FALSE
CACAAGGGCATGGGGCGGTCG	siRNA352	352	TRUE	FALSE	mlo	0	FALSE	6.76153e-06	FALSE	351	+	FALSE	TRUE
ACAAGGGCATGGGGCGGTCGG	siRNA353	353	FALSE	FALSE	mlo	0	FALSE	0.00601481	FALSE	352	+	FALSE	FALSE
CAAGGGCATGGGGCGGTCGGA	siRNA354	354	FALSE	FALSE	mlo	0	FALSE	0.00629652	FALSE	353	+	FALSE	FALSE
AAGGGCATGGGGCGGTCGGAC	siRNA355	355	FALSE	FALSE	mlo	0	FALSE	0.00316746	FALSE	354	+	FALSE	FALSE
AGGGCATGGGGCGGTCGGACG	siRNA356	356	TRUE	FALSE	mlo	0	FALSE	0.000795267	FALSE	355	+	FALSE	FALSE
GGGCATGGGGCGGTCGGACGA	siRNA357	357	TRUE	FALSE	mlo	0	FALSE	0.00211339	FALSE	356	+	TRUE	TRUE
GGCATGGGGCGGTCGGACGAC	siRNA358	358	TRUE	FALSE	mlo	0	FALSE	0.00261422	FALSE	357	+	TRUE	TRUE
GCATGGGGCGGTCGGACGACC	siRNA359	359	TRUE	FALSE	mlo	0	FALSE	0.0165578	FALSE	358	+	TRUE	TRUE
CATGGGGCGGTCGGACGACCC	siRNA360	360	FALSE	FALSE	mlo	0	FALSE	0.0175641	FALSE	359	+	FALSE	FALSE
ATGGGGCGGTCGGACGACCCC	siRNA361	361	FALSE	FALSE	mlo	0	FALSE	0.0401902	FALSE	360	+	FALSE	FALSE
TGGGGCGGTCGGACGACCCCC	siRNA362	362	FALSE	FALSE	mlo	0	FALSE	0.0185905	FALSE	361	+	FALSE	FALSE
GGGGCGGTCGGACGACCCCCA	siRNA363	363	TRUE	FALSE	mlo	0	FALSE	0.0239803	FALSE	362	+	TRUE	TRUE
GGGCGGTCGGACGACCCCCAG	siRNA364	364	FALSE	FALSE	mlo	0	FALSE	0.00993093	FALSE	363	+	FALSE	FALSE
GGCGGTCGGACGACCCCCAGA	siRNA365	365	TRUE	FALSE	mlo	0	FALSE	0.0104432	FALSE	364	+	TRUE	TRUE
GCGGTCGGACGACCCCCAGAG	siRNA366	366	TRUE	FALSE	mlo	0	FALSE	0.00492162	FALSE	365	+	TRUE	TRUE
CGGTCGGACGACCCCCAGAGC	siRNA367	367	TRUE	FALSE	mlo	0	FALSE	0.0059016	FALSE	366	+	TRUE	TRUE
GGTCGGACGACCCCCAGAGCG	siRNA368	368	TRUE	FALSE	mlo	0	FALSE	0.0036408	FALSE	367	+	TRUE	TRUE
GTCGGACGACCCCCAGAGCGC	siRNA369	369	FALSE	FALSE	mlo	0	FALSE	0.00247922	FALSE	368	+	FALSE	FALSE
TCGGACGACCCCCAGAGCGCG	siRNA370	370	FALSE	FALSE	mlo	0	FALSE	0.00332714	FALSE	369	+	FALSE	FALSE
CGGACGACCCCCAGAGCGCGC	siRNA371	371	FALSE	FALSE	mlo	0	FALSE	0.00285966	FALSE	370	+	FALSE	FALSE
GGACGACCCCCAGAGCGCGCC	siRNA372	372	TRUE	FALSE	mlo	0	FALSE	0.00298064	FALSE	371	+	FALSE	TRUE
GACGACCCCCAGAGCGCGCCC	siRNA373	373	FALSE	FALSE	mlo	0	FALSE	0.00350574	FALSE	372	+	FALSE	FALSE
ACGACCCCCAGAGCGCGCCCA	siRNA374	374	FALSE	FALSE	mlo	0	FALSE	0.00855753	FALSE	373	+	FALSE	FALSE
CGACCCCCAGAGCGCGCCCAC	siRNA375	375	FALSE	FALSE	mlo	0	FALSE	0.0021369	FALSE	374	+	FALSE	FALSE
GACCCCCAGAGCGCGCCCACC	siRNA376	376	TRUE	FALSE	mlo	0	FALSE	0.0250764	FALSE	375	+	TRUE	TRUE
ACCCCCAGAGCGCGCCCACCT	siRNA377	377	FALSE	FALSE	mlo	0	FALSE	0.0483812	FALSE	376	+	FALSE	FALSE
CCCCCAGAGCGCGCCCACCTC	siRNA378	378	TRUE	FALSE	mlo	0	FALSE	0.0190034	FALSE	377	+	FALSE	TRUE
CCCCAGAGCGCGCCCACCTCG	siRNA379	379	TRUE	FALSE	mlo	0	FALSE	0.011838	FALSE	378	+	TRUE	TRUE
CCCAGAGCGCGCCCACCTCGC	siRNA380	380	TRUE	FALSE	mlo	0	FALSE	0.00792468	FALSE	379	+	TRUE	TRUE
CCAGAGCGCGCCCACCTCGCC	siRNA381	381	TRUE	FALSE	mlo	0	FALSE	0.0145626	FALSE	380	+	TRUE	TRUE
CAGAGCGCGCCCACCTCGCCA	siRNA382	382	FALSE	FALSE	mlo	0	FALSE	0.0413558	FALSE	381	+	FALSE	FALSE
AGAGCGCGCCCACCTCGCCAA	siRNA383	383	FALSE	FALSE	mlo	0	FALSE	0.0373835	FALSE	382	+	FALSE	FALSE
GAGCGCGCCCACCTCGCCAAG	siRNA384	384	TRUE	FALSE	mlo	0	FALSE	0.020874	FALSE	383	+	FALSE	TRUE
AGCGCGCCCACCTCGCCAAGG	siRNA385	385	TRUE	FALSE	mlo	0	FALSE	0.0130257	FALSE	384	+	TRUE	TRUE
GCGCGCCCACCTCGCCAAGGA	siRNA386	386	TRUE	FALSE	mlo	0	FALSE	0.0510101	FALSE	385	+	TRUE	TRUE
CGCGCCCACCTCGCCAAGGAC	siRNA387	387	TRUE	FALSE	mlo	0	FALSE	0.0333516	FALSE	386	+	FALSE	TRUE
GCGCCCACCTCGCCAAGGACC	siRNA388	388	TRUE	TRUE	mlo	0	FALSE	0.103135	TRUE	387	+	TRUE	TRUE
CGCCCACCTCGCCAAGGACCC	siRNA389	389	TRUE	FALSE	mlo	0	FALSE	0.110612	TRUE	388	+	FALSE	TRUE
GCCCACCTCGCCAAGGACCCA	siRNA390	390	TRUE	TRUE	mlo	0	FALSE	0.110051	TRUE	389	+	TRUE	TRUE
CCCACCTCGCCAAGGACCCAG	siRNA391	391	FALSE	FALSE	mlo	0	FALSE	0.0384028	FALSE	390	+	FALSE	FALSE
CCACCTCGCCAAGGACCCAGC	siRNA392	392	TRUE	FALSE	mlo	0	FALSE	0.0378439	FALSE	391	+	FALSE	TRUE
CACCTCGCCAAGGACCCAGCA	siRNA393	393	FALSE	FALSE	mlo	0	FALSE	0.0494668	FALSE	392	+	TRUE	TRUE
ACCTCGCCAAGGACCCAGCAG	siRNA394	394	FALSE	FALSE	mlo	0	FALSE	0.0414547	FALSE	393	+	FALSE	FALSE
CCTCGCCAAGGACCCAGCAGG	siRNA395	395	TRUE	FALSE	mlo	0	FALSE	0.00512166	FALSE	394	+	FALSE	FALSE
CTCGCCAAGGACCCAGCAGGA	siRNA396	396	FALSE	FALSE	mlo	0	FALSE	0.00592573	FALSE	395	+	FALSE	TRUE
TCGCCAAGGACCCAGCAGGAG	siRNA397	397	FALSE	FALSE	mlo	0	FALSE	0.000562043	FALSE	396	+	FALSE	FALSE
CGCCAAGGACCCAGCAGGAGG	siRNA398	398	TRUE	FALSE	mlo	0	FALSE	0.00116121	FALSE	397	+	TRUE	TRUE
GCCAAGGACCCAGCAGGAGGC	siRNA399	399	TRUE	FALSE	mlo	0	FALSE	0.00604802	FALSE	398	+	TRUE	TRUE
CCAAGGACCCAGCAGGAGGCT	siRNA400	400	TRUE	FALSE	mlo	0	FALSE	0.0133203	FALSE	399	+	FALSE	TRUE
CAAGGACCCAGCAGGAGGCTA	siRNA401	401	FALSE	FALSE	mlo	0	FALSE	0.021989	FALSE	400	+	FALSE	FALSE
AAGGACCCAGCAGGAGGCTAG	siRNA402	402	FALSE	FALSE	mlo	0	FALSE	0.0268913	FALSE	401	+	FALSE	FALSE
AGGACCCAGCAGGAGGCTAGG	siRNA403	403	TRUE	FALSE	mlo	0	FALSE	0.0336669	FALSE	402	+	TRUE	TRUE
GGACCCAGCAGGAGGCTAGGG	siRNA404	404	TRUE	FALSE	mlo	0	FALSE	0.0408506	FALSE	403	+	TRUE	TRUE
GACCCAGCAGGAGGCTAGGGA	siRNA405	405	FALSE	FALSE	mlo	0	FALSE	0.0608851	FALSE	404	+	FALSE	FALSE
ACCCAGCAGGAGGCTAGGGAC	siRNA406	406	FALSE	FALSE	mlo	0	FALSE	0.0576509	FALSE	405	+	FALSE	FALSE
CCCAGCAGGAGGCTAGGGACA	siRNA407	407	TRUE	FALSE	mlo	0	FALSE	0.088513	FALSE	406	+	TRUE	TRUE
CCAGCAGGAGGCTAGGGACAT	siRNA408	408	FALSE	FALSE	mlo	0	FALSE	0.0157373	FALSE	407	+	FALSE	FALSE
CAGCAGGAGGCTAGGGACATG	siRNA409	409	TRUE	FALSE	mlo	0	FALSE	0.000320144	FALSE	408	+	TRUE	TRUE
AGCAGGAGGCTAGGGACATGT	siRNA410	410	TRUE	FALSE	mlo	0	FALSE	0.0002327	FALSE	409	+	TRUE	TRUE
GCAGGAGGCTAGGGACATGTA	siRNA411	411	TRUE	FALSE	mlo	0	FALSE	0.0525962	FALSE	410	+	TRUE	TRUE
CAGGAGGCTAGGGACATGTAC	siRNA412	412	TRUE	FALSE	mlo	0	FALSE	0.0973627	FALSE	411	+	FALSE	TRUE
AGGAGGCTAGGGACATGTACC	siRNA413	413	TRUE	FALSE	mlo	0	FALSE	0.0621123	FALSE	412	+	TRUE	TRUE
GGAGGCTAGGGACATGTACCC	siRNA414	414	TRUE	FALSE	mlo	0	FALSE	0.0454279	FALSE	413	+	TRUE	TRUE
GAGGCTAGGGACATGTACCCG	siRNA415	415	FALSE	FALSE	mlo	0	FALSE	0.0343071	FALSE	414	+	FALSE	FALSE
AGGCTAGGGACATGTACCCGG	siRNA416	416	FALSE	FALSE	mlo	0	FALSE	0.0252864	FALSE	415	+	FALSE	FALSE
GGCTAGGGACATGTACCCGGT	siRNA417	417	TRUE	FALSE	mlo	0	FALSE	0.0287443	FALSE	416	+	TRUE	TRUE
GCTAGGGACATGTACCCGGTT	siRNA418	418	FALSE	FALSE	mlo	0	FALSE	0.0107863	FALSE	417	+	FALSE	FALSE
CTAGGGACATGTACCCGGTTG	siRNA419	419	FALSE	FALSE	mlo	0	FALSE	0.00678489	FALSE	418	+	FALSE	FALSE
TAGGGACATGTACCCGGTTGT	siRNA420	420	TRUE	FALSE	mlo	0	FALSE	0.00450526	FALSE	419	+	FALSE	TRUE
AGGGACATGTACCCGGTTGTG	siRNA421	421	TRUE	FALSE	mlo	0	FALSE	0.000376688	FALSE	420	+	TRUE	TRUE
GGGACATGTACCCGGTTGTGG	siRNA422	422	TRUE	FALSE	mlo	0	FALSE	0.000134844	FALSE	421	+	TRUE	TRUE
GGACATGTACCCGGTTGTGGT	siRNA423	423	TRUE	FALSE	mlo	0	FALSE	0.000117898	FALSE	422	+	FALSE	TRUE
GACATGTACCCGGTTGTGGTG	siRNA424	424	FALSE	FALSE	mlo	0	FALSE	1.97193e-05	FALSE	423	+	FALSE	TRUE
ACATGTACCCGGTTGTGGTGG	siRNA425	425	TRUE	FALSE	mlo	0	FALSE	1.87451e-05	FALSE	424	+	FALSE	FALSE
CATGTACCCGGTTGTGGTGGC	siRNA426	426	FALSE	FALSE	mlo	0	FALSE	1.67348e-05	FALSE	425	+	FALSE	FALSE
ATGTACCCGGTTGTGGTGGCG	siRNA427	427	FALSE	FALSE	mlo	0	FALSE	0.00015167	FALSE	426	+	FALSE	FALSE
TGTACCCGGTTGTGGTGGCGC	siRNA428	428	FALSE	FALSE	mlo	0	FALSE	1.0942e-05	FALSE	427	+	FALSE	FALSE
GTACCCGGTTGTGGTGGCGCA	siRNA429	429	FALSE	FALSE	mlo	0	FALSE	3.11389e-05	FALSE	428	+	FALSE	FALSE
TACCCGGTTGTGGTGGCGCAC	siRNA430	430	FALSE	FALSE	mlo	0	FALSE	0.000122145	FALSE	429	+	FALSE	FALSE
ACCCGGTTGTGGTGGCGCACC	siRNA431	431	TRUE	FALSE	mlo	0	FALSE	0.000123559	FALSE	430	+	FALSE	TRUE
CCCGGTTGTGGTGGCGCACCC	siRNA432	432	TRUE	FALSE	mlo	0	FALSE	4.90044e-05	FALSE	431	+	TRUE	TRUE
CCGGTTGTGGTGGCGCACCCG	siRNA433	433	TRUE	FALSE	mlo	0	FALSE	6.00888e-06	FALSE	432	+	TRUE	TRUE
CGGTTGTGGTGGCGCACCCGG	siRNA434	434	FALSE	FALSE	mlo	0	FALSE	6.95901e-08	FALSE	433	+	FALSE	FALSE
GGTTGTGGTGGCGCACCCGGT	siRNA435	435	FALSE	FALSE	mlo	0	FALSE	7.27336e-08	FALSE	434	+	FALSE	FALSE
GTTGTGGTGGCGCACCCGGTG	siRNA436	436	FALSE	FALSE	mlo	0	FALSE	2.81311e-08	FALSE	435	+	FALSE	FALSE
TTGTGGTGGCGCACCCGGTGC	siRNA437	437	FALSE	FALSE	mlo	0	FALSE	1.51663e-08	FALSE	436	+	FALSE	FALSE
TGTGGTGGCGCACCCGGTGCA	siRNA438	438	FALSE	FALSE	mlo	0	FALSE	1.0416e-07	FALSE	437	+	FALSE	FALSE
GTGGTGGCGCACCCGGTGCAC	siRNA439	439	FALSE	FALSE	mlo	0	FALSE	6.66535e-06	FALSE	438	+	FALSE	FALSE
TGGTGGCGCACCCGGTGCACA	siRNA440	440	TRUE	FALSE	mlo	0	FALSE	1.41216e-05	FALSE	439	+	FALSE	FALSE
GGTGGCGCACCCGGTGCACAG	siRNA441	441	TRUE	FALSE	mlo	0	FALSE	6.16826e-06	FALSE	440	+	FALSE	TRUE
GTGGCGCACCCGGTGCACAGA	siRNA442	442	TRUE	FALSE	mlo	0	FALSE	4.3992e-05	FALSE	441	+	TRUE	TRUE
TGGCGCACCCGGTGCACAGAC	siRNA443	443	FALSE	FALSE	mlo	0	FALSE	4.61518e-05	FALSE	442	+	FALSE	FALSE
GGCGCACCCGGTGCACAGACT	siRNA444	444	TRUE	FALSE	mlo	0	FALSE	0.000196623	FALSE	443	+	TRUE	TRUE
GCGCACCCGGTGCACAGACTA	siRNA445	445	TRUE	FALSE	mlo	0	FALSE	0.0372637	FALSE	444	+	FALSE	TRUE
CGCACCCGGTGCACAGACTAA	siRNA446	446	TRUE	TRUE	mlo	0	FALSE	0.512766	TRUE	445	+	TRUE	TRUE
GCACCCGGTGCACAGACTAAA	siRNA447	447	TRUE	TRUE	mlo	0	FALSE	0.501927	TRUE	446	+	TRUE	TRUE
CACCCGGTGCACAGACTAAAT	siRNA448	448	TRUE	TRUE	mlo	0	FALSE	0.341252	TRUE	447	+	TRUE	TRUE
ACCCGGTGCACAGACTAAATC	siRNA449	449	TRUE	TRUE	mlo	0	FALSE	0.357817	TRUE	448	+	TRUE	TRUE
CCCGGTGCACAGACTAAATCC	siRNA450	450	TRUE	TRUE	mlo	0	FALSE	0.277507	TRUE	449	+	TRUE	TRUE
CCGGTGCACAGACTAAATCCT	siRNA451	451	TRUE	TRUE	mlo	0	FALSE	0.281033	TRUE	450	+	TRUE	TRUE
CGGTGCACAGACTAAATCCTA	siRNA452	452	TRUE	FALSE	mlo	0	FALSE	0.266735	TRUE	451	+	FALSE	TRUE
GGTGCACAGACTAAATCCTAA	siRNA453	453	TRUE	TRUE	mlo	0	FALSE	0.204238	TRUE	452	+	TRUE	TRUE
GTGCACAGACTAAATCCTAAC	siRNA454	454	TRUE	TRUE	mlo	0	FALSE	0.148509	TRUE	453	+	TRUE	TRUE
TGCACAGACTAAATCCTAACG	siRNA455	455	TRUE	TRUE	mlo	0	FALSE	0.119275	TRUE	454	+	TRUE	TRUE
GCACAGACTAAATCCTAACGA	siRNA456	456	TRUE	FALSE	mlo	0	FALSE	0.0962905	FALSE	455	+	TRUE	TRUE
CACAGACTAAATCCTAACGAC	siRNA457	457	FALSE	FALSE	mlo	0	FALSE	0.0866572	FALSE	456	+	FALSE	FALSE
ACAGACTAAATCCTAACGACA	siRNA458	458	TRUE	FALSE	mlo	0	FALSE	0.0937971	FALSE	457	+	FALSE	FALSE
CAGACTAAATCCTAACGACAG	siRNA459	459	FALSE	FALSE	mlo	0	FALSE	0.0385725	FALSE	458	+	FALSE	FALSE
AGACTAAATCCTAACGACAGG	siRNA460	460	TRUE	FALSE	mlo	0	FALSE	0.00636011	FALSE	459	+	FALSE	TRUE
GACTAAATCCTAACGACAGGA	siRNA461	461	FALSE	FALSE	mlo	0	FALSE	0.000182353	FALSE	460	+	FALSE	TRUE
ACTAAATCCTAACGACAGGAG	siRNA462	462	FALSE	FALSE	mlo	0	FALSE	4.59521e-05	FALSE	461	+	FALSE	FALSE
CTAAATCCTAACGACAGGAGG	siRNA463	463	FALSE	FALSE	mlo	0	FALSE	1.94257e-05	FALSE	462	+	FALSE	FALSE
TAAATCCTAACGACAGGAGGA	siRNA464	464	FALSE	FALSE	mlo	0	FALSE	5.1812e-06	FALSE	463	+	FALSE	FALSE
AAATCCTAACGACAGGAGGAG	siRNA465	465	FALSE	FALSE	mlo	0	FALSE	1.39154e-06	FALSE	464	+	FALSE	FALSE
AATCCTAACGACAGGAGGAGG	siRNA466	466	FALSE	FALSE	mlo	0	FALSE	5.8687e-07	FALSE	465	+	FALSE	FALSE
ATCCTAACGACAGGAGGAGGT	siRNA467	467	FALSE	FALSE	mlo	0	FALSE	2.51056e-07	FALSE	466	+	FALSE	FALSE
TCCTAACGACAGGAGGAGGTC	siRNA468	468	TRUE	FALSE	mlo	0	FALSE	2.4961e-05	FALSE	467	+	FALSE	TRUE
CCTAACGACAGGAGGAGGTCC	siRNA469	469	TRUE	FALSE	mlo	0	FALSE	3.3306e-05	FALSE	468	+	TRUE	TRUE
CTAACGACAGGAGGAGGTCCG	siRNA470	470	FALSE	FALSE	mlo	0	FALSE	4.01527e-05	FALSE	469	+	FALSE	FALSE
TAACGACAGGAGGAGGTCCGC	siRNA471	471	FALSE	FALSE	mlo	0	FALSE	7.46371e-06	FALSE	470	+	FALSE	FALSE
AACGACAGGAGGAGGTCCGCC	siRNA472	472	FALSE	FALSE	mlo	0	FALSE	1.13275e-05	FALSE	471	+	FALSE	FALSE
ACGACAGGAGGAGGTCCGCCT	siRNA473	473	FALSE	FALSE	mlo	0	FALSE	3.64904e-05	FALSE	472	+	FALSE	FALSE
CGACAGGAGGAGGTCCGCCTC	siRNA474	474	FALSE	FALSE	mlo	0	FALSE	3.94165e-05	FALSE	473	+	FALSE	FALSE
GACAGGAGGAGGTCCGCCTCG	siRNA475	475	TRUE	FALSE	mlo	0	FALSE	9.61975e-05	FALSE	474	+	TRUE	TRUE
ACAGGAGGAGGTCCGCCTCGT	siRNA476	476	FALSE	FALSE	mlo	0	FALSE	0.0681258	FALSE	475	+	FALSE	FALSE
CAGGAGGAGGTCCGCCTCGTC	siRNA477	477	FALSE	FALSE	mlo	0	FALSE	0.0277834	FALSE	476	+	FALSE	FALSE
AGGAGGAGGTCCGCCTCGTCG	siRNA478	478	TRUE	FALSE	mlo	0	FALSE	0.00226393	FALSE	477	+	TRUE	TRUE
GGAGGAGGTCCGCCTCGTCGT	siRNA479	479	FALSE	FALSE	mlo	0	FALSE	0.000682721	FALSE	478	+	FALSE	FALSE
GAGGAGGTCCGCCTCGTCGTC	siRNA480	480	FALSE	FALSE	mlo	0	FALSE	0.000682675	FALSE	479	+	FALSE	TRUE
